# Supplementary material
Source: PubMed Central journal article supplement (PMC5407730)
Supplement: ASN.2016070806SupplementaryData.pdf [file ASN.2016070806SupplementaryData.pdf]

**On-line Only Supplemental Material**

**Supplementary Table 1: Baseline characteristics of controls with and without available baseline creatinine**

|                                               | <b>Creatinine Controls</b><br>(n=8,971) | <b>General Controls</b><br>(n = 15,669) |        |
|-----------------------------------------------|-----------------------------------------|-----------------------------------------|--------|
| <b>Demographics</b>                           |                                         |                                         |        |
| Age – years                                   | 30.3 ± 6.0                              | 30.3 ± 6.0                              | p=0.32 |
| Non-white race                                | 44 (3,959)                              | 45 (7,033)                              | p=0.26 |
| Married                                       | 69 (6,182)                              | 69 (10,798)                             | p>0.9  |
| High school education                         | 83 (6,534)                              | 80 (10,203)                             | p=0.03 |
| <b>Initial Prenatal Visit Characteristics</b> |                                         |                                         |        |
| Gestational age at visit – weeks              | 12.7 ± 6.2                              | 12.7 ± 4.6                              | p=0.66 |
| Body Mass Index – kg/m <sup>2</sup>           | 25.4 ± 5.7                              | 25.4 ± 4.3                              | p>0.9  |
| Nulliparous                                   | 48 (4,252)                              | 48 (7,490)                              | p=0.43 |
| Pre-existing Hypertension                     | 2 (214)                                 | 2 (376)                                 | p>0.9  |
| Pre-existing Diabetes                         | 3 (272)                                 | 3 (459)                                 | p=0.67 |
| Systolic blood pressure – mmHg                | 111 ± 13                                | 111 ± 9                                 | p=0.19 |
| Diastolic blood pressure – mmHg               | 69 ± 10                                 | 68 ± 7                                  | p=0.24 |

Data are presented as % (n) or the mean ± SD or unless otherwise indicated.
